# Supplementary material for: Targeting STAT3 by a small molecule suppresses pancreatic cancer progression
Source: PubMed Central journal article supplement (PMC7906907; doi:10.1038/s41388-020-01626-z), 2021-01-08
Supplement: 41388_2020_1626_MOESM2_ESM.pdf [file 41388_2020_1626_MOESM2_ESM.pdf]

## Mail:

Dear all authors:

Please note that you are listed as a co-author on the manuscript "Targeting STAT3 by a small molecule suppresses pancreatic cancer progression" (reference number: ONC-2020-00196RRR), which has been provisionally accepted for publication in Oncogene. For the final acceptance for this paper, please ensure the authorship, and reply to this email confirming that you agree to the author list. The detailed author list are: Huang Chen<sup>1#</sup>, Aiwu Bian<sup>1#</sup>, Lian-fang Yang<sup>2</sup>, Xuan Yin<sup>3</sup>, Jie Wang<sup>2</sup>, Chaowen Ti<sup>1</sup>, Ying Miao<sup>1</sup>, Shihong Peng<sup>1</sup>, Shifen Xu<sup>3</sup>, Mingyao Liu<sup>1\*</sup>, Wen-Wei Qiu<sup>2\*</sup> and Zhengfang Yi<sup>1, 2\*</sup>.

Thank you very much.

Sincerely,

Zhengfang Yi

**From:** 袁正芳  
**Date:** 2020-11-26 16:01  
**To:** 陈耀; 边爱斌; 3115379443; yinxuan0623; 873992624; 1319152365  
**CC:** miaomying; shihong\_peng9001; xu\_teacher2006; myliu; wwtliu; 杨连芳  
**Subject:** Please ensure the authorship about ONC-2020-00196RRR.

Dear all authors:

Please note that you are listed as a co-author on the manuscript "Targeting STAT3 by a small molecule suppresses pancreatic cancer progression" (reference number: ONC-2020-00196RRR), which has been **provisionally** accepted for publication in Oncogene. For the final acceptance for this paper, please ensure the authorship, and reply to this email confirming that **you agree to the author list**. The detailed author list are: Huang Chen<sup>1#</sup>, Aiwu Bian<sup>1#</sup>, Lian-fang Yang<sup>2</sup>, Xuan Yin<sup>3</sup>, Jie Wang<sup>2</sup>, Chaowen Ti<sup>1</sup>, Ying Miao<sup>1</sup>, Shihong Peng<sup>1</sup>, Shifen Xu<sup>3</sup>, Mingyao Liu<sup>1\*</sup>, Wen-Wei Qiu<sup>2\*</sup> and Zhengfang Yi<sup>1, 2\*</sup>.

Thank you very much.

Sincerely,

Zhengfang Yi

## Response of all author:

### Huang Chen:

**Re:Please ensure the authorship about ONC-2020-00196RRR.** 📧 🏷️ 🕒 🗑️

发件人: 陈煌 <huangchen9104@163.com>

收件人: 易正芳 <zfyi@bio.ecnu.edu.cn>

抄送人: 边爱斌 <bian\_aiwu@163.com> 3115379443 <3115379443@qq.com> yinxuan0623 <yinxuan0623@hotmail.com>  
1319152365 <1319152365@qq.com> ↓还有6个联系人 保存所有抄送人

时 间: 2020年11月26日 16:08 (星期四)

Dear professor Yi:  
I agree with the authorship of this manuscript.

Thank You very much.  
Huang Chen

### Aiwu Bian:

**Re: Please ensure the authorship about ONC-2020-00196RRR.** 📧 🏷️ 🕒

发件人: 边爱斌 <bian\_aiwu@163.com>

收件人: 易正芳 <zfyi@bio.ecnu.edu.cn>

抄送人: 陈煌 <huangchen9104@163.com> 3115379443 <3115379443@qq.com>  
提超文 <1319152365@qq.com> ↓还有6个联系人 保存所有抄送人

时 间: 2020年11月26日 16:12 (星期四)

Dear professor Yi:  
I agree with the authorship of this manuscript.

Thank You very much.  
Aiwu Bian

## Lian-fang Yang:

**回复: Please ensure the authorship about ONC-2020-00196RRR.**    

发件人: 杨 <3115379443@qq.com>

收件人: 易正芳 <zfyi@bio.ecnu.edu.cn> 陈煌 <huangchen9104@163.com>  边爱斌 <bian\_aiwu@163.com>

[个联系人](#) [保存所有收件人](#)

时 间: 2020年11月26日 17:56 (星期四)

---

Dear professor Yi: I agree with the authorship of this manuscript. Thank You very much. Lianfang Yang

## Xuan Yin:

**Re: Please ensure the authorship about ONC-2020-00196RRR.**    

发件人: 殷萱 <yinxuan0623@hotmail.com>

收件人: 易正芳 <zfyi@bio.ecnu.edu.cn>

时 间: 2020年11月26日 16:26 (星期四)

---

Dear Professor Yi:

I agree with the authorship of this manuscript.

Thank You very much.

Xuan Yin

## Jie Wang:

**回复: Please ensure the authorship about ONC-2020-00196RRR.**    

发件人: 王杰 <873993624@qq.com>

收件人: 易正芳 <zfyi@bio.ecnu.edu.cn>

时 间: 2020年11月26日 17:13 (星期四)

---

Dear professor Yi:

I agree with the authorship of this manuscript.

Thank You very much.

Jie Wang

## Ying Miao:

**Re:Please ensure the authorship about ONC-2020-00196RRR.**    

发件人: miaomying <miaomying@163.com>

收件人: 易正芳 <zfyi@bio.ecnu.edu.cn>

时 间: 2020年11月27日 13:19 (星期五)

Dear professor Yi:

I agree with the authorship of this manuscript.

Thank You very much.

Ying Miao

## Chaowen Ti:

**回复: Please ensure the authorship about ONC-2020-00196RRR.**    

发件人: 提超文 <1319152365@qq.com>

收件人: 易正芳 <zfyi@bio.ecnu.edu.cn> 陈煌 <huangchen9104@163.com>  边爱斌 <bian\_aiwu@1

1个联系人 保存所有收件人

抄送人: miaomying <miaomying@163.com> shihong\_peng9001 <shihong\_peng9001@yeah.net> x

wwqiu <wwqiu@chem.ecnu.edu.cn> ↓还有1个联系人 保存所有抄送人

时 间: 2020年11月26日 16:24 (星期四)

Dear professor Yi:

I agree with the authorship of this manuscript.

Thank You very much.

Chaowen Ti

## Shihong Peng:

**Re: Please ensure the authorship about ONC-2020-00196RRR.** 📧 📅 🕒 🖨

发件人: 彭世鸿 <shihong\_peng9001@yeah.net>

收件人: 易正芳 老师 <zfyi@bio.ecnu.edu.cn>

抄送人: 陈煌 <huangchen9104@163.com>  边爱斌 <bian\_aiwu@163.com> 3115379443@qq.com  
873993624@qq.com <873993624@qq.com> ↓还有6个联系人 保存所有抄送人

时 间: 2020年11月26日 16:10 (星期四)

Dear professor Yi:

I agree with the authorship of this manuscript.

Thank you very much.

Shihong Peng, Ph.D

## Shifen Xu:

**Re:Please ensure the authorship about ONC-2020-00196RRR.** 📧 📅 🕒 🖨

发件人: peony <xu\_teacher2006@126.com>

收件人: 易正芳 <zfyi@bio.ecnu.edu.cn>

抄送人: 陈煌 <huangchen9104@163.com>  边爱斌 <bian\_aiwu@163.com> 3115379443 <3115379443@qq.com> yinxuar  
↓还有6个联系人 保存所有抄送人

时 间: 2020年11月27日 12:44 (星期五)

Dear Professor Yi:

I agree with the authorship of this manuscript.

Thank you very much

--

Shifen Xu MD & PhD

## Mingyao Liu:

**Re:Please ensure the authorship about ONC-2020-00196RRR.**

发件人: 刘明耀 <myliu@bio.ecnu.edu.cn>

收件人: 易正芳 <zfyi@bio.ecnu.edu.cn>

时 间: 2020年11月30日 10:33 (星期一)

Dear professor Yi:

I agree with the authorship of this manuscript.

Thank You very much.

Mingyao Liu

## Wen-Wei Qiu:

发件人: wwqiu@chem.ecnu.edu.cn <wwqiu@chem.ecnu.edu.cn>

收件人: zfyi <zfyi@bio.ecnu.edu.cn> huangchen9104 <huangchen9104@163.com>

yinxuan0623 <yinxuan0623@hotmail.com> ↓还有2个联系人 保存所有收件人

抄送人: miaomying <miaomying@163.com> 彭世鸿 <shihong\_peng9001@yeah.net>

1198756058 <1198756058@qq.com>

时 间: 2020年11月27日 14:27 (星期五)

Dear professor Yi:

I agree with the authorship of this manuscript.

Thank You very much.

Wen-Wei Qiu
